# Supplementary material for: Performance Characteristics of the New Definition of Diabetes: The Insulin Resistance Atherosclerosis Study
Source: PubMed Central journal article supplement — Diabetes Care. 2009 Oct 30;33(2):335–7. doi: 10.2337/dc09-1357 (PMC2809276; doi:10.2337/dc09-1357), 2009-10-30
Supplement: supp_dc09-1357_dc09-1357_Online_appendix.pdf [file supp_dc09-1357_dc09-1357_Online_appendix.pdf]

**Online Appendix Table: Characteristics by categories of hemoglobin A1c (A1C)**

|                                          | [1] A1C <6.0%      | [2] A1C 6.0 - 6.4% | [3] A1C ≥6.5%      | 1 vs. 2<br>p value | 1 vs. 3<br>p value | 2 vs. 3<br>p value | p for<br>trend |
|------------------------------------------|--------------------|--------------------|--------------------|--------------------|--------------------|--------------------|----------------|
| Number                                   | 766                | 45                 | 44                 | -                  | -                  | -                  | -              |
| Age *                                    | 59.7 ± 0.3         | 61.6 ± 1.3         | 59.6 ± 1.3         | 0.151              | 0.936              | 0.217              | 0.602          |
| Female (%) *                             | 57.3 (53.8 – 60.8) | 51.1 (36.8 – 65.2) | 61.4 (46.4 – 74.4) | 0.415              | 0.597              | 0.331              | 0.894          |
| Ethnicity (%): *                         |                    |                    |                    | 0.107              | 0.013              | 0.467              | 0.004          |
| African Americans                        | 24.5 (21.6 – 27.7) | 28.9 (17.6 – 43.6) | 38.7 (25.6 – 53.6) |                    |                    |                    |                |
| Hispanics                                | 33.3 (30.0 – 36.7) | 44.4 (30.8 – 59.0) | 36.4 (23.6 – 51.4) |                    |                    |                    |                |
| Non-Hispanic whites                      | 42.2 (38.7 – 45.7) | 26.7 (15.8 – 41.3) | 25.0 (14.4 – 39.7) |                    |                    |                    |                |
| BMI (kg/m <sup>2</sup> )                 | 28.4 ± 0.2         | 35.0 ± 0.8         | 32.2 ± 0.8         | <0.001             | <0.001             | 0.052              | <0.001         |
| Waist circumference (cm)                 | 91.4 ± 0.4         | 104.2 ± 1.7        | 100.5 ± 1.8        | <0.001             | <0.001             | 0.161              | <0.001         |
| Systolic blood pressure (mm Hg)          | 126.0 ± 0.6        | 129.0 ± 2.5        | 130.9 ± 2.6        | 0.245              | 0.061              | 0.937              | 0.034          |
| Diastolic blood pressure (mm Hg)         | 77.6 ± 0.3         | 78.2 ± 1.3         | 79.6 ± 1.4         | 0.700              | 0.158              | 0.880              | 0.155          |
| Antihypertensive medications (%)         | 20.4 (17.2 – 24.1) | 29.6 (18.2 – 44.4) | 17.4 (9.1 – 30.6)  | 0.138              | 0.584              | 0.135              | 0.875          |
| Triglyceride concentration (mg/dl) †     | 111.3 ± 2.1        | 118.4 ± 9.3        | 141.7 ± 11.2       | 0.449              | 0.002              | 0.184              | 0.002          |
| HDL cholesterol concentration (mg/dl)    | 50.2 ± 0.5         | 43.6 ± 2.1         | 43.4 ± 2.1         | 0.003              | 0.002              | 0.787              | <0.001         |
| Total cholesterol concentration (mg/dl)  | 209.0 ± 1.3        | 205.7 ± 5.3        | 202.2 ± 5.4        | 0.519              | 0.214              | 0.354              | 0.178          |
| Treatment with lipid-lowering agents (%) | 4.6 (3.2 – 6.8)    | 8.7 (3.4 – 20.7)   | 5.7 (1.8 – 17.1)   | 0.189              | 0.715              | 0.649              | 0.389          |
| Fasting glucose concentration (mg/dl)    | 98.1 ± 0.6         | 118.0 ± 2.5        | 160.4 ± 2.5        | <0.001             | <0.001             | <0.001             | <0.001         |
| 2-h glucose concentration (mg/dl)        | 133.5 ± 1.7        | 182.1 ± 7.2        | 271.7 ± 7.3        | <0.001             | <0.001             | <0.001             | <0.001         |
| HOMA IR †                                | 3.61 ± 0.08        | 7.92 ± 0.73        | 8.18 ± 0.76        | <0.001             | <0.001             | 0.971              | <0.001         |
| HOMA2 %S                                 | 67.3 ± 1.3         | 38.6 ± 5.6         | 47.2 ± 5.6         | <0.001             | <0.001             | 0.185              | <0.001         |
| Number of metabolic disorders            | 1.99 ± 0.05        | 3.35 ± 0.20        | 3.39 ± 0.20        | <0.001             | <0.001             | 0.889              | <0.001         |
| Central obesity (%)                      | 32.6 (28.7 – 36.7) | 71.9 (56.5 – 83.5) | 67.2 (51.3 – 80.0) | <0.001             | <0.001             | 0.455              | <0.001         |
| Elevated triglyceride concentration (%)  | 28.1 (24.4 – 32.2) | 31.3 (18.8 – 47.2) | 50.6 (35.0 – 66.1) | 0.678              | 0.004              | 0.102              | 0.007          |

## Online Appendix Table (continue)

|                                                                                                                      |                    |                    |                    |        |        |        |        |
|----------------------------------------------------------------------------------------------------------------------|--------------------|--------------------|--------------------|--------|--------|--------|--------|
| Low HDL cholesterol concentration (%)                                                                                | 44.6 (40.4 – 48.9) | 68.4 (52.8 – 80.7) | 67.6 (52.1 – 80.0) | 0.004  | 0.005  | 0.940  | <0.001 |
| Elevated blood pressure (%)                                                                                          | 47.4 (43.2 – 51.7) | 72.6 (56.0 – 84.6) | 61.6 (45.0 – 75.9) | 0.005  | 0.097  | 0.139  | 0.008  |
| Elevated fasting glucose (%)                                                                                         | 36.6 (32.6 – 40.8) | 93.0 (80.1 – 97.8) | 93.6 (81.5 – 98.0) | <0.001 | <0.001 | 0.826  | <0.001 |
| Metabolic syndrome (%)                                                                                               | 34.2 (30.3 – 38.3) | 71.3 (56.0 – 82.9) | 80.5 (66.1 – 89.7) | <0.001 | <0.001 | 0.519  | <0.001 |
| Insulin sensitivity index, $S_I$ ( $\times 10^{-4} \text{ min}^{-1} \cdot \mu\text{U}^{-1} \cdot \text{ml}^{-1}$ ) † | 1.20 ± 0.04        | 0.45 ± 0.10        | 0.46 ± 0.76        | <0.001 | <0.001 | 0.994  | <0.001 |
| Acute insulin response, AIR ( $\mu\text{U/ml}$ ) †                                                                   | 66.0 ± 1.9         | 51.4 ± 6.3         | 27.2 ± 3.4         | 0.041  | <0.001 | <0.001 | <0.001 |

Results adjusted for age, sex, race/ethnicity, and center; \* Unadjusted results; † Log-transformed variables. These variables were then back-transformed to their units for presentation in the table.

HOMA IR indicates homeostasis model assessment of insulin resistance as defined by Matthew DR et al. (Diabetologia 1985;28:412-419); HOMA2 %S, recalibrated HOMA using computer program by Levy J et al. (Diabetes Care 1998; 21: 2191-2192); Metabolic syndrome and metabolic abnormalities were defined according to the American Heart Association/National Heart, Lung, and Blood Institute criteria (Grundy SM et al. Circulation 2005;112:2735-2752); Direct measures of insulin sensitivity (insulin sensitivity index [ $S_I$ ]) and  $\beta$ -cell function (acute insulin response [AIR]) were obtained using the frequently sampled intravenous glucose tolerance test (Wagenknecht LE et al. Ann Epidemiol 1995;5:464-472).
